# Supplementary material for: Chemical synthesis of transition metal oxide nanotubes in water using an iced lipid nanotube as a template
Source: Royal Society of Chemistry journal article supplement (doi:10.1039/b507782f), 2005-01-01

## Electronic Supplementary Information

### Chemical Synthesis of Transition Metal Oxide Nanotubes in Water

#### Using an Iced Lipid Nanotube as a Template

Qingmin Ji,<sup>a</sup> and Toshimi Shimizu<sup>a,b</sup>

<sup>a</sup> Nanoarchitectonics Research Center (NARC), National Institute of Advanced Industrial Science and Technology (AIST), Tsukuba Central 5, 1-1-1 Higashi, Tsukuba, Ibaraki 305-8565, Japan.

<sup>b</sup> CREST, Japan Science and Technology Agency (JST), Tsukuba Central 4, 1-1-1 Higashi, Tsukuba, Ibaraki 305-8562, Japan.

**X-ray Powder Diffraction Patterns (XRD).** The powder samples was measured on Rigaku Rint 2100 x-ray diffractometer, monochromated Cu-K $\alpha$  radiation ( $\lambda = 1.54178 \text{ \AA}$ ).

**XRD Spectra.** We showed the XRD spectra of titania oxide, tantalum oxide and vanadium oxide nanotubes obtained using lipid nanotubes as template. Spectrum 1 is titania oxide nanotubes after calcinations at 500 °C. Spectrum 2 is tantalum oxide nanotubes after calcinations at 500 °C. Spectrum 3 is vanadium oxide nanotubes after calcinations at 500 °C.

Spectrum 1

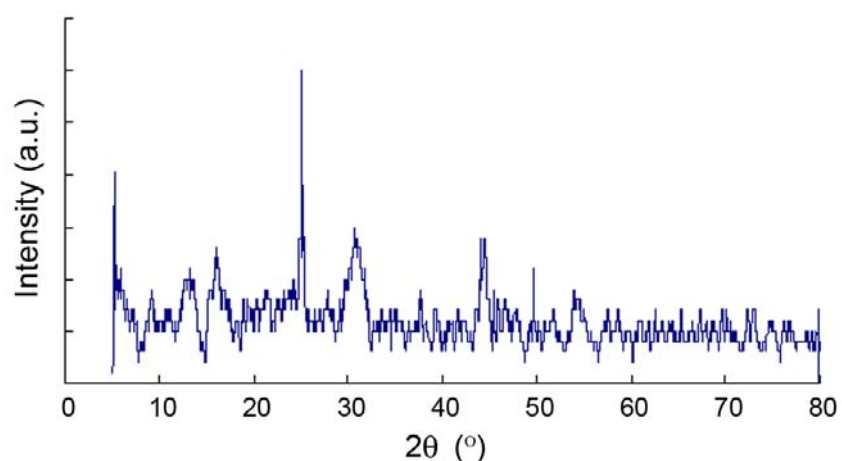

Spectrum 2

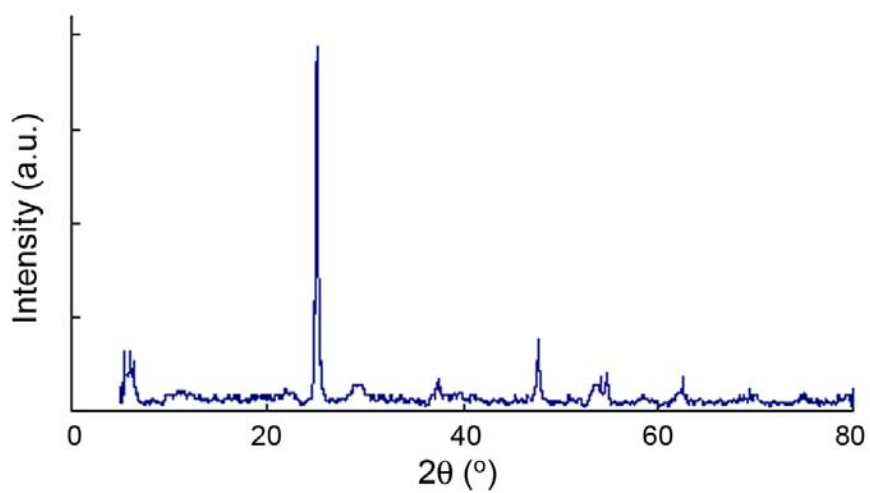

**Spectrum 3**

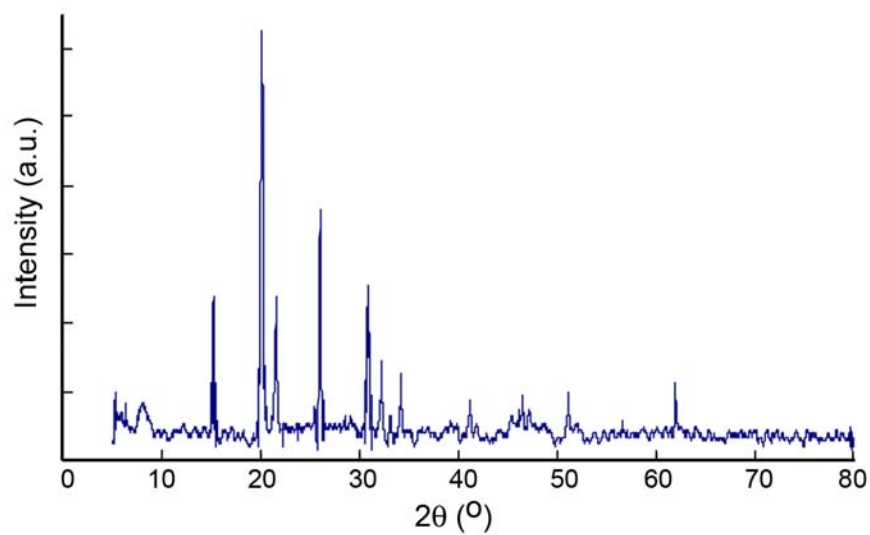

Supplement: b507782f.pdf [file b507782f.pdf]
